# Supplementary material for: Engineering autologous tumor cell vaccine to locally mobilize antitumor immunity in tumor surgical bed
Source: PubMed Central journal article supplement — Sci Adv. 2020 Jun 19;6(25):eaba4024. doi: 10.1126/sciadv.aba4024 (PMC7304971; doi:10.1126/sciadv.aba4024), 2020-06-19
Supplement: aba4024_SM.pdf [file aba4024_SM.pdf]

## Supplementary Materials for

### **Engineering autologous tumor cell vaccine to locally mobilize antitumor immunity in tumor surgical bed**

Lei Fang, Zitong Zhao, Jue Wang, Pengcheng Zhang, Yaping Ding, Yanyan Jiang, Dangge Wang\*, Yaping Li\*

\*Corresponding author. Email: [dgwang@simm.ac.cn](mailto:dgwang@simm.ac.cn) (D.W.); [ypli@simm.ac.cn](mailto:ypli@simm.ac.cn) (Y.L.)

Published 19 June 2020, *Sci. Adv.* **6**, eaba4024 (2020)

DOI: [10.1126/sciadv.aba4024](https://doi.org/10.1126/sciadv.aba4024)

#### **This PDF file includes:**

Table S1

Figs. S1 to S9

**Table S1. List of antibodies used for flow cytometric examination.**

| <b>Antibody</b>          | <b>Clone</b> | <b>Fluorophore</b> | <b>Detector</b> | <b>Company</b> |
|--------------------------|--------------|--------------------|-----------------|----------------|
| CD3e                     | 145-2C11     | PerCP-Cy5.5        | FL3-H           | eBioscience    |
| CD8a                     | 53-6.7       | FITC               | FL1-H           | eBioscience    |
| CD8a                     | 53-6.7       | PE                 | FL2-H           | eBioscience    |
| CD86                     | GL1          | PE                 | FL2-H           | eBioscience    |
| CD4                      | H129.19      | FITC               | FL1-H           | BD Pharmingen  |
| CD11c                    | N418         | FITC               | FL1-H           | BD Pharmingen  |
| CD80                     | 16-10A1      | PE                 | FL2-H           | BD Pharmingen  |
| CD86                     | GL1          | PE-Cy7             | FL3-H           | BD Pharmingen  |
| CD25                     | 3C7          | APC                | FL4-H           | BD Pharmingen  |
| FoxP3                    | MF23         | PE                 | FL2-H           | BD Pharmingen  |
| IFN- $\gamma$            | XMG1.2       | FITC               | FL1-H           | BD Pharmingen  |
| CD44                     | IM7          | PerCP-Cy5.5        | FL3-H           | BioLegend      |
| CD127                    | A7R34        | PE                 | FL2-H           | BioLegend      |
| OVA<br>tetramer-SIINFEKL | -            | PE                 | FL2-H           | MBL            |

## Supplemental Figures

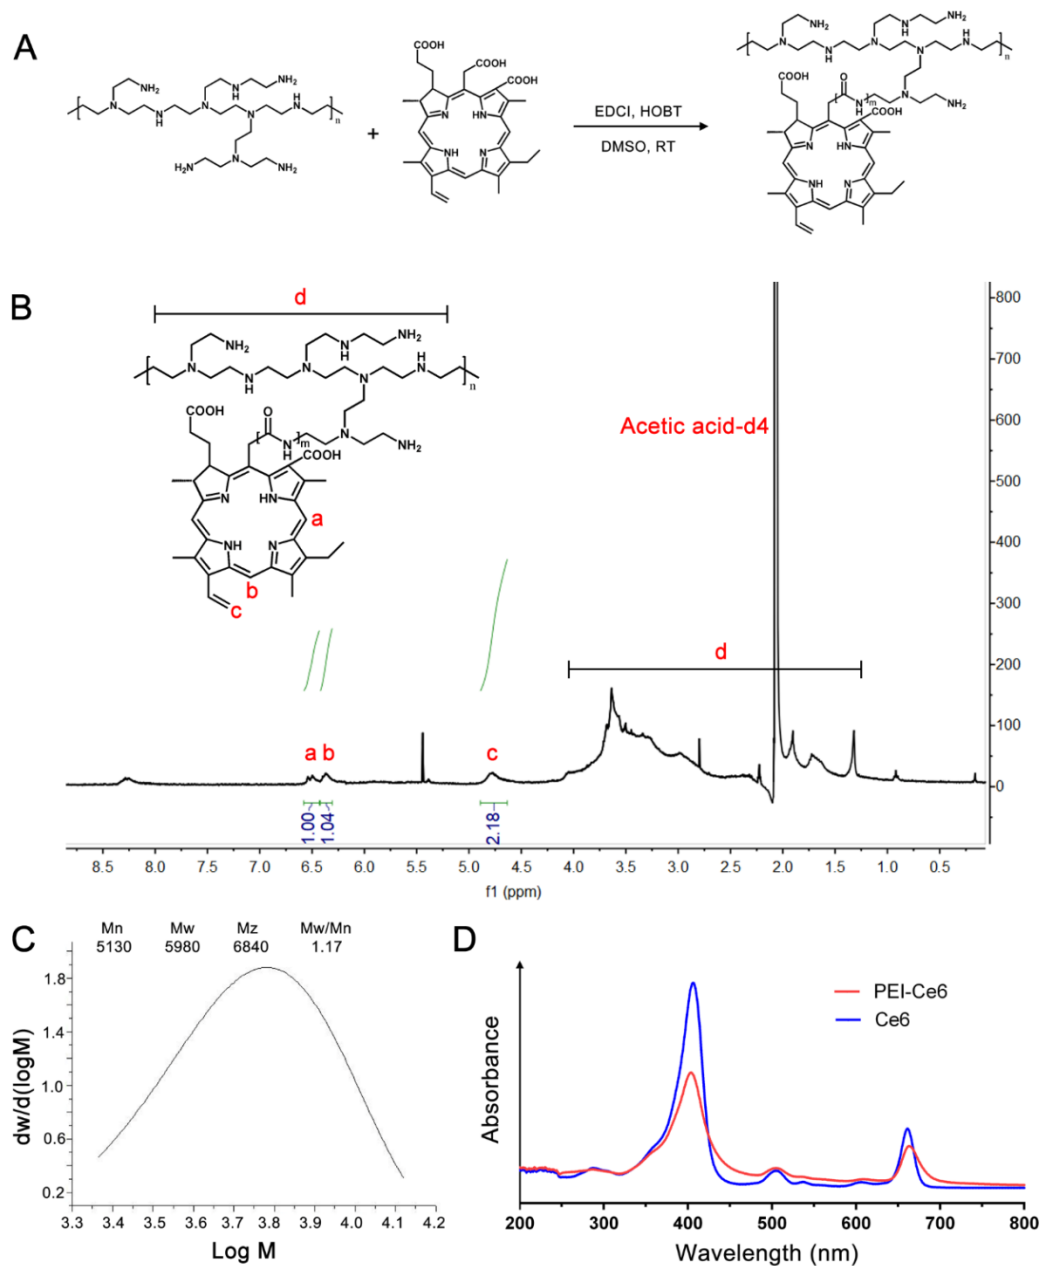

**Fig. S1. Synthesis and characterization of PEI-Ce6. (A)** Synthetic route of PEI-Ce6.

**(B)**  $^1\text{H-NMR}$  spectra of PEI-Ce6 in acetic acid- $\text{d}_4$ .

**(C)** Gel permeation chromatography (GPC) examination of molecular weight and polydispersity index

(PDI) of PEI-Ce6. **(D)** UV-vis spectrum of PEI-Ce6 and Ce6.

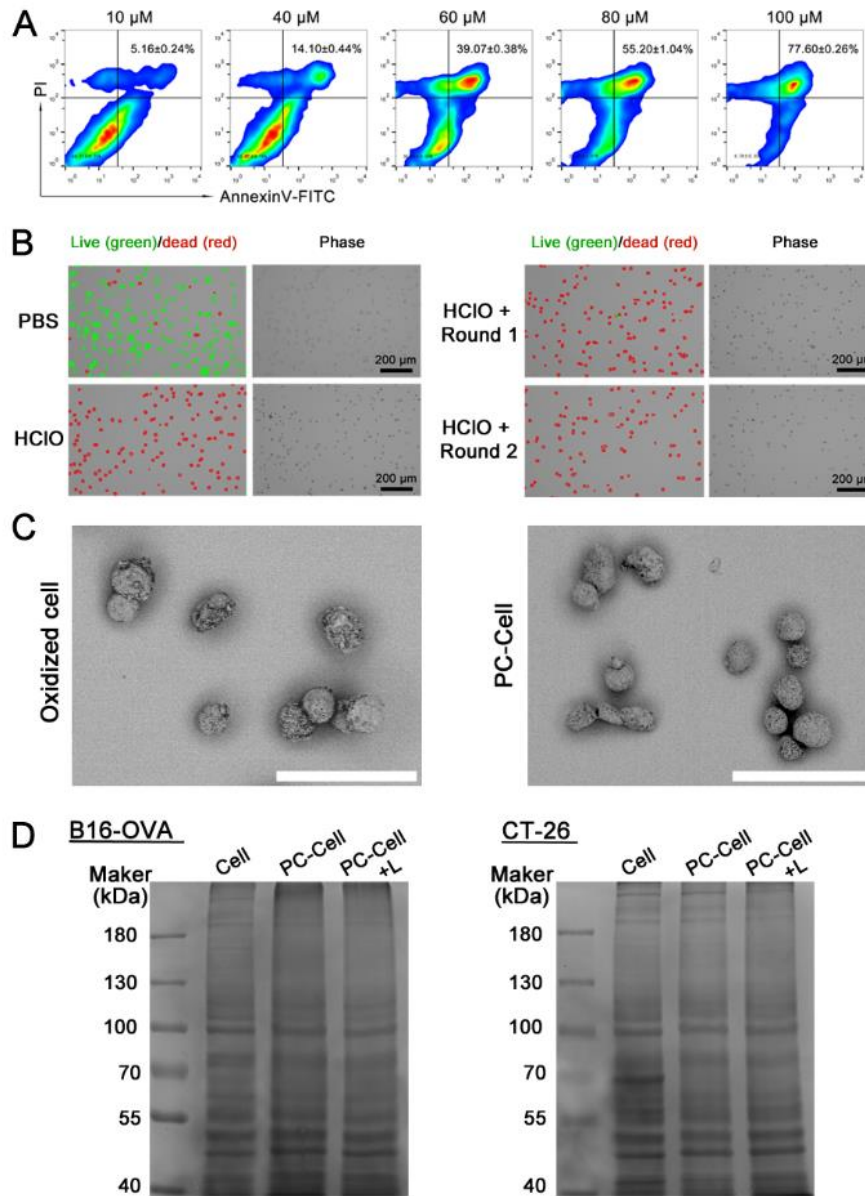

**Fig. S2. Apoptosis, SEM images and protein electrophoresis of oxidized tumour cells and PC-Cell.** (A) Screening of HClO concentrations to induce apoptosis/necrosis in tumour cells by Annexin V/PI apoptosis detection kits. (B) Live-dead staining assay and phase images of tumour cells treated by HClO and freeze-thaw cycles. (C) SEM images of oxidized tumour cells and PC-Cell. Scale bar, 20 μm. (D) SDS-PAGE electrophoresis of proteins in B16-OVA and CT26-derived PC-Cell complexes with or without laser irradiation (300 mW/cm<sup>2</sup>, 5 min).

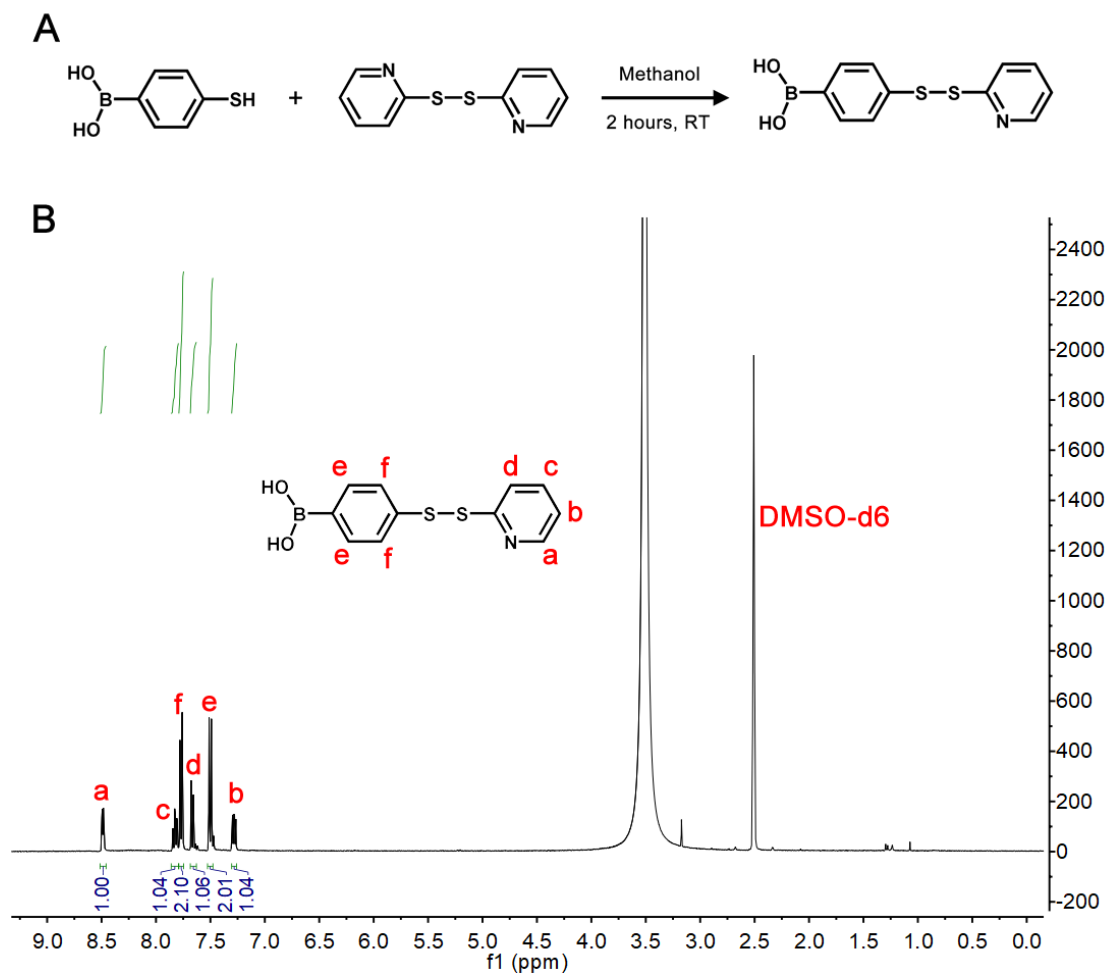

**Fig. S3. Synthesis of 4-(dipyridyl disulfide)-phenylboronic acid. (A)** Synthetic route. **(B)** <sup>1</sup>H-NMR spectra of the product in DMSO-d<sub>6</sub>.

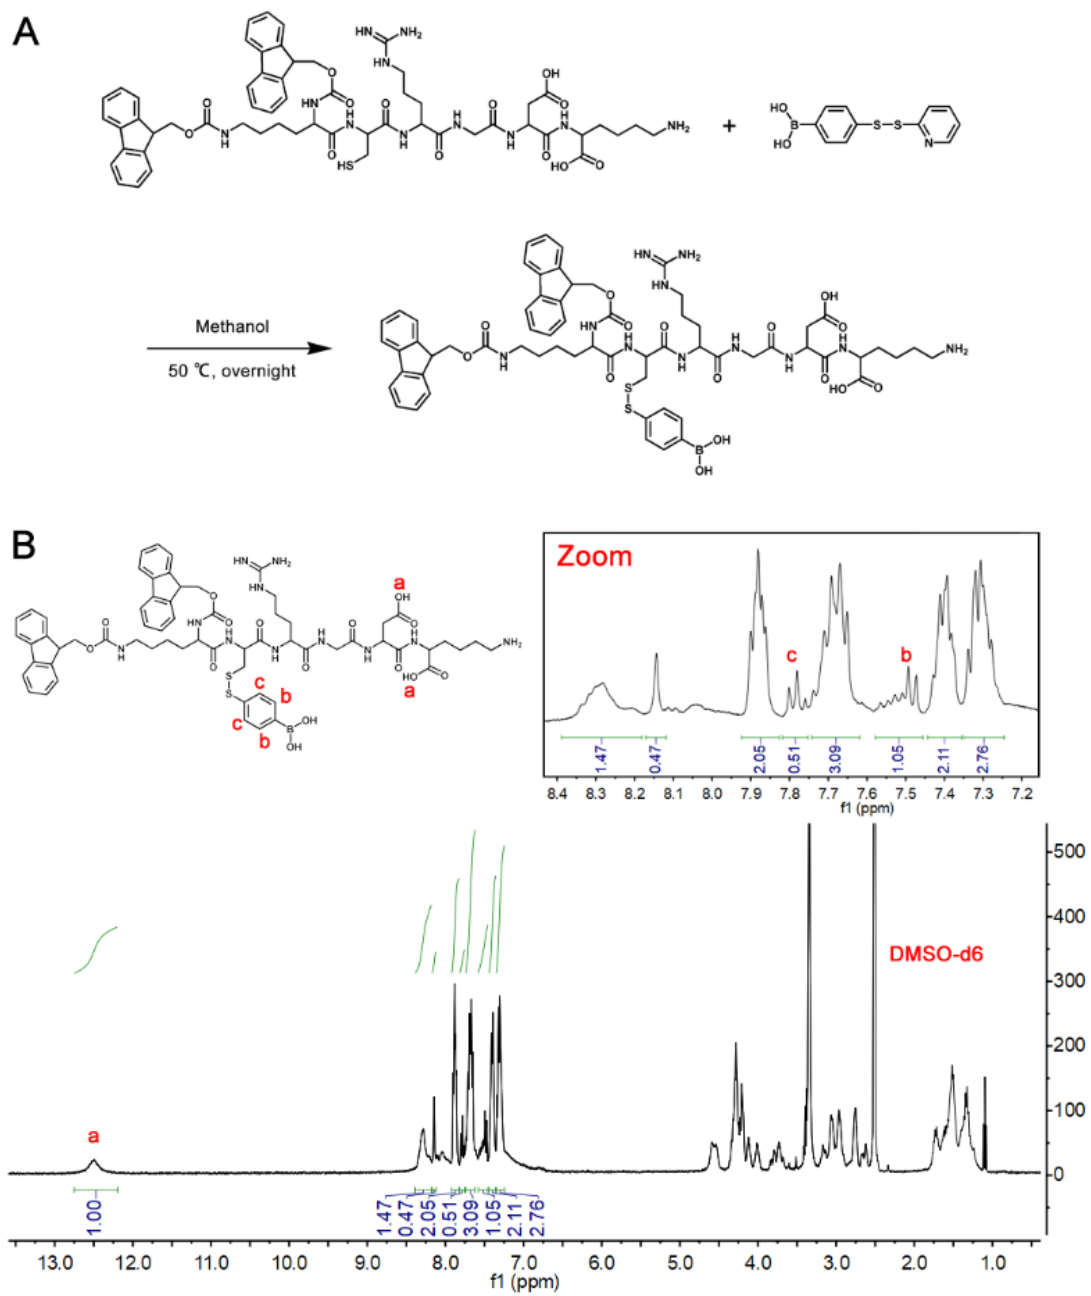

**Fig. S4. Synthesis and characterization of FK-PBA.** (A) Synthetic route of FK-PBA. (B)  $^1\text{H-NMR}$  spectra of FK-PBA in DMSO- $d_6$ .

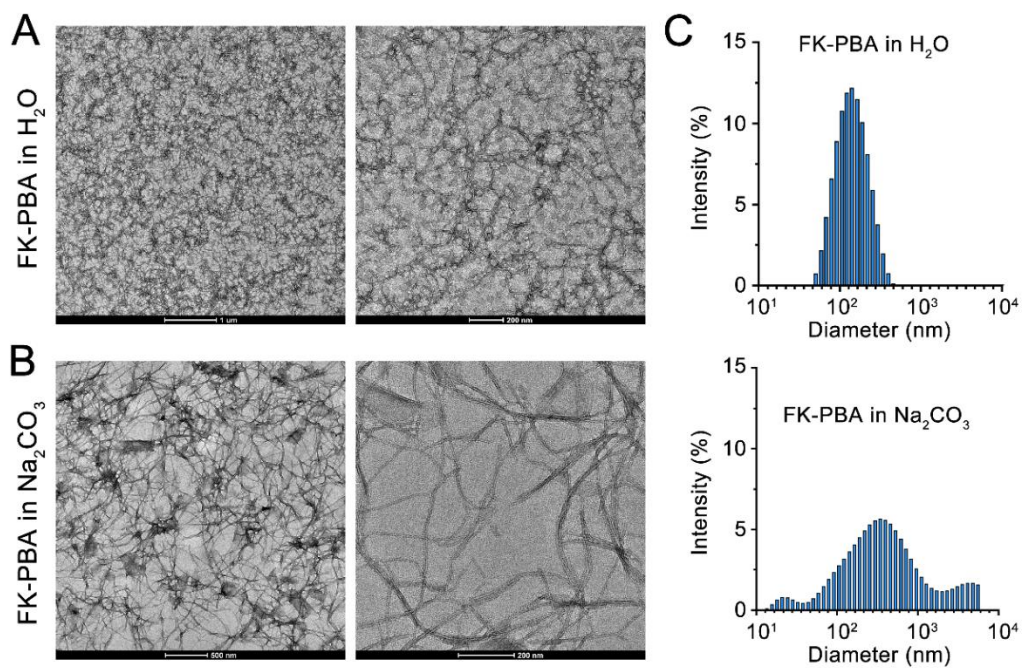

**Fig. S5. TEM and DLS examination of FK-PBA.** (A) TEM of FK-PBA dispersed in H<sub>2</sub>O. (B) TEM of FK-PBA dispersed in 1 mM of Na<sub>2</sub>CO<sub>3</sub>. (C) DLS examination of FK-PBA in different medium.

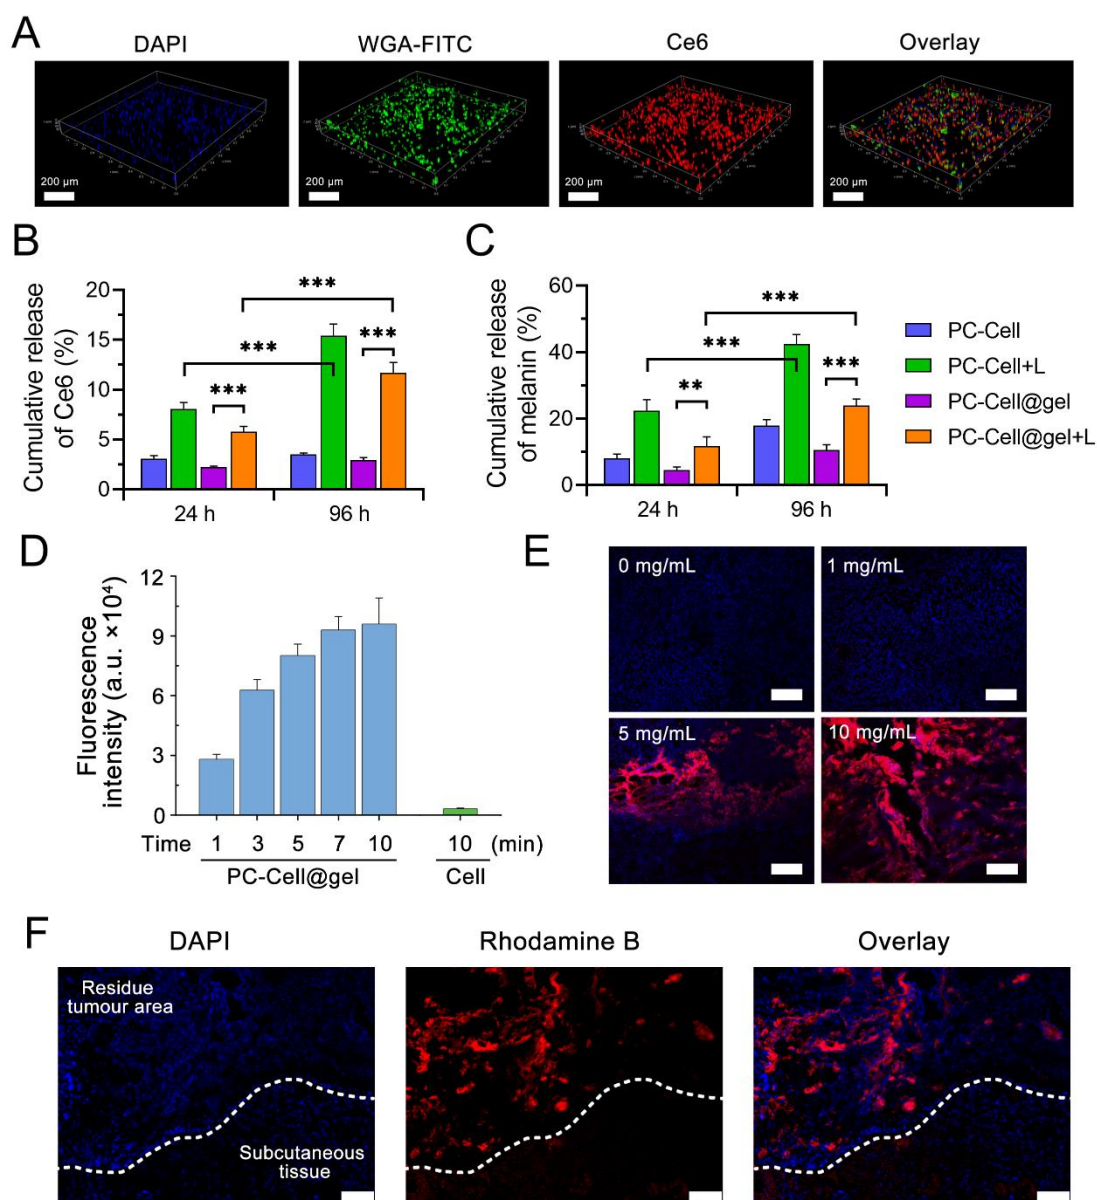

**Fig. S6. Release, photodynamic property of PC-Cell@gel and its on-demand gelation in tumour surgical bed.** (A) 3D construction image of FK-PBA hydrogel encapsulating PC-Cell. Cell membrane was labeled with WGA-FITC. Scale bar, 200  $\mu$ m. (B) Cumulative release of Ce6, and (C) melanin from B16-F10-Luc cell-driven PC-Cell or PC-Cell@gel after laser irradiation (300 mW/cm<sup>2</sup>, 5 min) at 24 h and 96 h, respectively. (D) ROS generation examined by SOSG probe after irradiated by 655 nm laser for various time duration. The Ce6 concentration and laser power density



were fixed at 10  $\mu\text{g}/\text{mL}$  and 300  $\text{mW}/\text{cm}^2$ , respectively. (E) Postoperative B16-OVA tumour-bearing mice were first locally injected with FK-PBA at 1, 5 and 10  $\text{mg}/\text{mL}$ , respectively. Rhodamine B dispersed in 1  $\text{mM}$   $\text{Na}_2\text{CO}_3$  solution was sequentially injected at 4 h. Tissues in surgical bed were collected and sliced for CLSM imaging at 72 h. Scale bar, 100  $\mu\text{m}$ . (F) Residual tumour was harvested from mice treated by 10  $\text{mg}/\text{mL}$  of FK-PBA and sliced for CLSM imaging at 72 h. Scale bar, 100  $\mu\text{m}$ . Data are means  $\pm$  SD.  $**P < 0.01$ ,  $***P < 0.001$ .

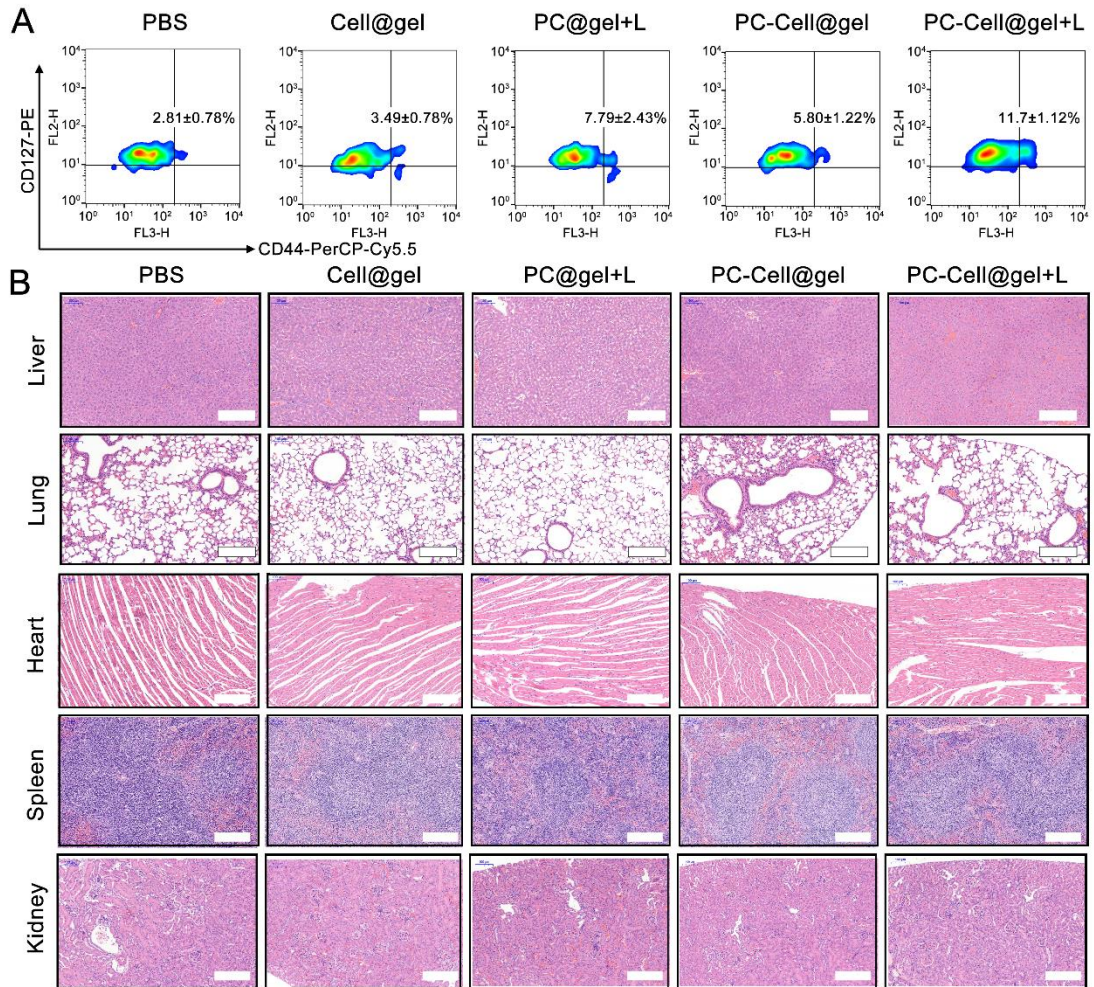

**Fig. S7. Immune memory effects and histochemical assay in vivo.** (A) Frequency of central memory CD8<sup>+</sup> T cells in lymph nodes on day 30 of the anti-relapse study. (B) H&E staining of major organs (liver, lung, heart, spleen and kidney). Scale bar, 200  $\mu$ m.

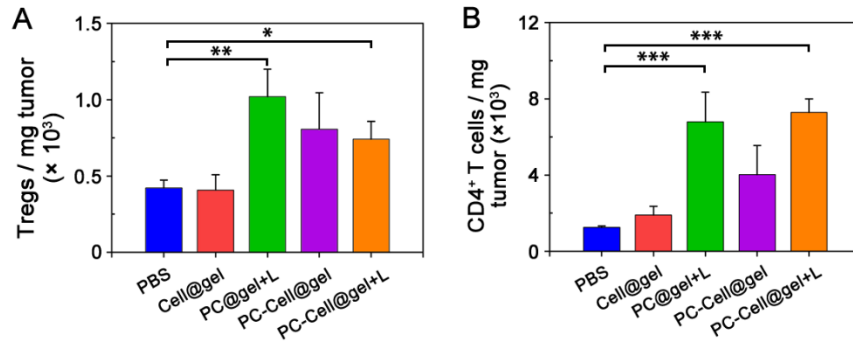

**Fig. S8. Weight-normalized number of (A) Tregs, and (B) CD4<sup>+</sup> T cells in tumour surgical bed in control and treated groups (n = 3). Data are means  $\pm$  SD. \* $P < 0.05$ , \*\* $P < 0.01$ , \*\*\* $P < 0.001$ .**

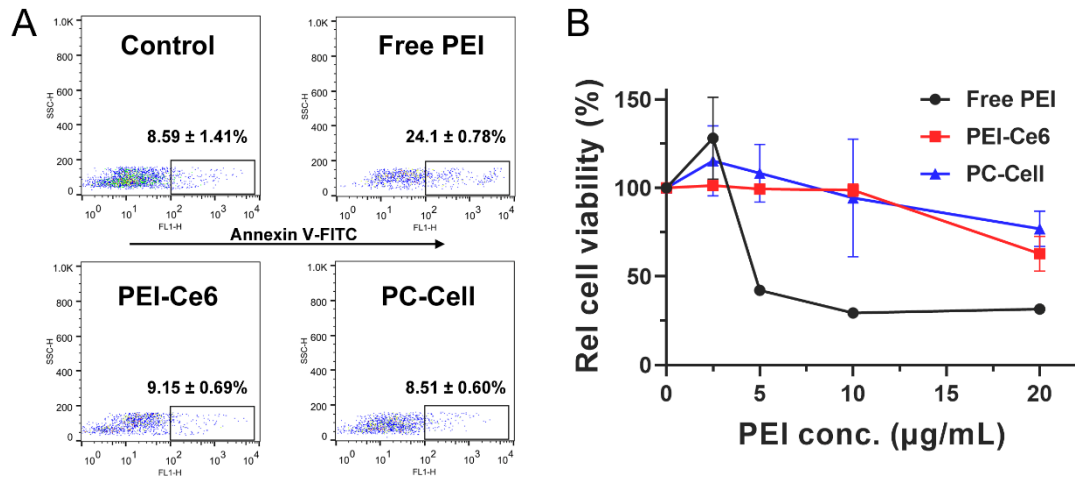

**Fig. S9. Cytotoxicity analysis of PEI and PC-Cell on tumour-infiltrated lymphocytes ex vivo. (A)** Apoptosis examination of samples with equal 5.0 µg/mL of PEI treated at 4 h. **(B)** Relative cell viability of lymphocytes incubated with various suspensions for 48 h were examined by CCK-8 assay kit. Data are means ± SD.
